# Supplementary material for: Information extraction from weakly structured radiological reports with natural language queries
Source: PubMed Central journal article supplement (PMC10791738; doi:10.1007/s00330-023-09977-3), 2023-07-28
Supplement: 330_2023_9977_MOESM1_ESM.pdf [file 330_2023_9977_MOESM1_ESM.pdf]

# Information extraction from weakly structured radiological reports with natural language queries

## Electronic Supplementary Material

### Training Configuration

We continued the pre-training of G-BERT and GM-BERT for two epochs on each dataset with the Adam optimizer. We configured a learning rate of  $5e-5$  with 500 warm-up steps and a weight decay of 0.01. The maximal sequence length of inputs is 512 tokens. We split reports that exceed this range into smaller chunks that we process individually. The stride length between these smaller subdivisions is 128 tokens. RadBERT was trained with the AdamW for ten epochs, while all other parameters are the same as for the other models. We used a batch size of 12 for G-BERT and GM-BERT and a batch size of 16 for RadBERT.

### RCQA Dataset

Table A.3 in the supplementary material lists all questions and their corresponding categories. We collected very few answers for some questions since some observations occur less frequently. This prevented us from making reliable statements on the capabilities of our models regarding these questions. To address this, we extended the dataset by performing a free-text search with a set of keywords that we assume to correlate with underrepresented questions (the supplementary material contains an overview of the keywords). We searched with regular expressions to exclude negated sentences and account for various word endings. We gathered 226 additional Head CT reports for the four rarest categories with this procedure. Figure A.2 shows the distribution of answerable questions after adding the new reports.

The annotation process resulted in about twice as many unanswerable (19,460) questions than answerable (9,813) ones since many predefined questions are not answerable. For instance, tumor-specific questions are not answerable in a report about a patient with a fracture. Following SQuAD 2.0, we deleted question-answer pairs to achieve a 2:1 ratio of answerable to unanswerable examples.

Afterward, we shuffle the reports and split them into five train and test folds based on the total number of reports (i.e., five splits with 80%/20% of the total reports). Each training fold contains 978 reports with an average number of 11,776 question-answer pairs. The test folds contain 245 reports and 3,078.4 question-answer pairs on average.

Figure A.1: Number of question-answer pairs for rarest questions. The numbering corresponds to the order of the questions in Table A.3

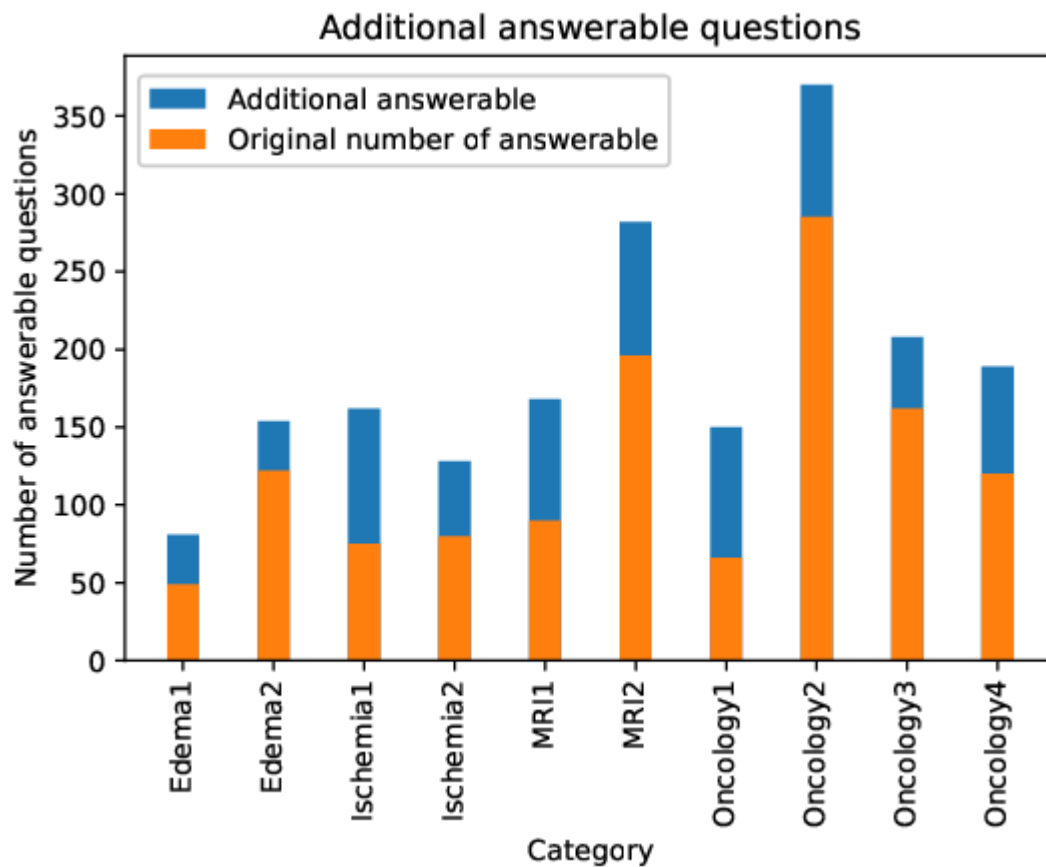

Table A.1: Type of modality and occurrence in the dataset.

| Modalities | Number |
|------------|--------|
| CTAB       | 160321 |
| CTB        | 9977   |
| CTGE       | 9991   |
| CTH        | 6312   |
| CTOE       | 2976   |
| CTS        | 170810 |
| CTSH       | 28954  |
| CTT        | 173826 |
| CTTA       | 13236  |
| CTUE       | 4280   |
| CTWS       | 16242  |
| MRA        | 17075  |
| MRB        | 5305   |
| MRBE       | 10833  |
| MRH        | 12128  |
| MRL        | 16357  |
| MRM        | 10712  |
| MROE       | 6120   |
| MRS        | 143135 |
| MRSH       | 9416   |
| MRTH       | 3832   |
| MRUE       | 14777  |
| MRWB       | 3656   |
| MRWS       | 7512   |

Table A.2: Categories and questions in the RCQA dataset.

| <b>Category</b>             | <b>Question</b>                                                                                                   |
|-----------------------------|-------------------------------------------------------------------------------------------------------------------|
| Allgemein                   | Klinische Angaben?                                                                                                |
|                             | (Haupt-)Fragestellung?                                                                                            |
|                             | Welche Untersuchung?                                                                                              |
|                             | Liegt eine Voruntersuchung vor?                                                                                   |
|                             | Liegt eine akute Pathologie vor?                                                                                  |
|                             | Gibt es eine raumfordernde Komponente der akuten Pathologie (Mittellinienverschiebung/ Gefahr einer Einklemmung)? |
|                             | Wurde ein Arzt kontaktiert aufgrund der akuten Pathologie?                                                        |
|                             | Anatomische Lage des Hauptbefund?                                                                                 |
|                             | Ist der Hauptbefund unauffällig?                                                                                  |
| Liegen Nebenergebnisse vor? |                                                                                                                   |
| Blutung                     | Liegt eine neue Blutung vor?                                                                                      |
|                             | Verlaufsbeurteilung der Blutung?                                                                                  |
| Fremdmaterial               | Ist die Installation lagekorrekt?                                                                                 |
| Ischämie                    | Liegt eine neue Ischämie/Infarktdemarkation vor?                                                                  |
|                             | Verlaufsbeurteilung der Ischämie/Infarktdemarkation?                                                              |
| Liquorzirkulation           | Liegt eine neue Liquorzirkulationsstörung vor?                                                                    |
|                             | Verlaufsbeurteilung der Ventrikelweite?                                                                           |
| Ödem                        | Liegt ein neues Hirnödeme vor?                                                                                    |
|                             | Verlaufsbeurteilung des Hirnödems?                                                                                |
| Entzündung                  | Liegt eine neue Entzündung/Läsion vor?                                                                            |
|                             | Verlaufsbeurteilung der Entzündung/Läsion?                                                                        |
| MRT<br>Signalveränderung    | Liegt eine Diffusionsstörung vor?                                                                                 |
|                             | Liegt eine FLAIR-Hyperintensität vor?                                                                             |
| Onkologie                   | Liegt eine neue Tumormanifestation vor?                                                                           |

---

Verlaufsbeurteilung der Tumormanifestation?

---

Beurteilung Perifokalödem

---

Gibt es Nachweis von Metastasen?

---

Table A.3: Translation of the categories and questions in the RCQA dataset.

| Category                      | Question                                                                                          |
|-------------------------------|---------------------------------------------------------------------------------------------------|
| General                       | Clinical information?                                                                             |
|                               | (Main) question?                                                                                  |
|                               | Which examination?                                                                                |
|                               | Is there a prior examination?                                                                     |
|                               | Is there an acute pathology?                                                                      |
|                               | Does the acute pathology have a space-occupying component? (midline shift/ danger of entrapment)? |
|                               | Was a doctor contacted due to the acute pathology?                                                |
|                               | Anatomical location of the main finding?                                                          |
|                               | Is the main finding inconspicuous?                                                                |
| Are there secondary findings? |                                                                                                   |
| Hemorrhage                    | Is there a new hemorrhage?                                                                        |
|                               | Progress of the hemorrhage?                                                                       |
| Foreign material              | Are the lines, tubes, and devices positioned correctly?                                           |
| Ischemia                      | Is there new evidence of ischemia or infarct?                                                     |
|                               | Progression of ischemia or infarct?                                                               |
| CSF circulation               | Is there a disturbance in CSF circulation?                                                        |
|                               | Progression of the ventricle width?                                                               |
| Edema                         | Is there new cerebral edema?                                                                      |

---

|                    |                                         |
|--------------------|-----------------------------------------|
|                    | Progression of the cerebral edema?      |
| Inflammation       | Is there a new inflammation/lesion?     |
|                    | Progression of the inflammation/lesion? |
| MRI signal changes | Is there a diffusion disturbance?       |
|                    | Is there a T2 hyperintensity?           |
| Oncology           | Is there a new tumor manifestation?     |
|                    | Progression of the tumor manifestation? |
|                    | Is there perifocal edema?               |
|                    | Is there evidence of metastases?        |

---

Table A.4: Search keywords for additional examples of less common categories.

| <b>Category</b>       | <b>Keywords</b>                                                                                                                     |
|-----------------------|-------------------------------------------------------------------------------------------------------------------------------------|
| Ischämie              | ['ischämie', 'infarktdemarkation', 'infarkt', 'mikroangiopathie']                                                                   |
| Ödem                  | ['ödem', 'schwellung', 'flüssigkeitsansammlungen', 'wasseransammlungen']                                                            |
| MRT Signalveränderung | ['diffusionsstörung', 'diffusionsrestriktion', 'diffusionseingeschränkt', 'schrankengestört', 'schrankensterung']                   |
| Onkologie             | ['tumor', 'meningeom', 'raumforderung', 'gliom', 'lymphom', 'meningeosis', 'meningeose', 'metastase', 'oligodendrogliom', 'osteom'] |

Table A.5: Translation of search keywords for additional examples of less common categories.

| <b>Category</b>    | <b>Keywords</b>                                                                                                                 |
|--------------------|---------------------------------------------------------------------------------------------------------------------------------|
| Ischemia           | ['ischemia', 'infarct demarcation', 'infarct', 'microangiopathy']                                                               |
| Edema              | ['edema', 'swelling', 'fluid accumulation', 'water accumulation']                                                               |
| MRI signal changes | ['diffusion disturbance', 'restricted diffusion', 'diffusion restricted', 'disrupted blood-brain barrier']                      |
| Oncology           | ['tumor', 'meningioma', 'space occupying lesion', 'glioma', 'lymphoma', 'spread', 'metastasis', 'oligodendroglioma', 'osteoma'] |
